# Supplementary material for: Severity-dependent atrial remodeling and atrial fibrillation vulnerability in a clinically relevant aortic regurgitation mouse model
Source: JCI journal article supplement (doi:10.1172/jci.insight.200770), 2026-03-12
Supplement: sd1 [file 1]

1 **SUPPLEMENTAL MATERIAL**

2  
3 **Severity-Dependent Atrial Remodeling and Atrial Fibrillation Vulnerability in**  
4 **a Clinically Relevant Aortic Regurgitation Mouse Model**

5 Robert Lakin, Xueyan Liu, Dana Sherrard<sup>#</sup>, Mihir Parikh<sup>#</sup>, Ryan Debi, Nazari  
6 Polidovitch, Markus J. Duncan, Jian Wu, Peter H. Backx

7 <sup>#</sup>contributed equally and share 3<sup>rd</sup> authorship

8  
9 **SUPPLEMENTAL METHODS**

10 **Experimental animals:** Male CD1 mice (7-8 weeks of age) from Charles River (Montreal,  
11 Canada) were used for all experiments. Mice were housed at a constant temperature (22±1°C) with  
12 a 12 h:12 h light-dark cycle and fed a standard laboratory mouse diet *ad libitum* with free access  
13 to water.

14  
15 **Aortic regurgitation surgery:** Aortic regurgitation (AR) was induced under ultrasound  
16 echocardiography imaging guidance as previously described (1). Briefly, mice were anesthetized  
17 with 3% isoflurane-oxygen mixture and administered Metacam (2mg/kg, s.c.) for analgesia. A  
18 midline incision was made, and the salivary glands were gently moved aside to locate and isolate  
19 right carotid artery from the vagus nerve. Next, a suture was tied anteriorly around the vessel with  
20 two additional threads, one acting as a bridge to prevent blood loss and the other to tie around the  
21 artery and secure a plastic micro-cannula containing a metal wire (Fine Science Tools, USA), were  
22 added posteriorly. Once inserted into the right carotid, the cannula was advanced from the  
23 proximal aorta to the aortic valve, and the metal wire was advanced through the cannula to

24 puncture the valve until significant peak retrograde diastolic flow ( $\geq 200$  mm/s) was initially  
25 observed in the aortic arch using pulse-wave Doppler (Vevo2100, VisualSonics, Toronto,  
26 Canada)(see **Figure 1B**). Thereafter, systolic and diastolic aortic flows were quantified at the aortic  
27 arch using pulse-wave Doppler recordings. Systolic and diastolic velocity-time integrals (VTIs)  
28 were quantified in real-time by measuring the area of the negative ( $VTI_{systolic}$ ) and positive  
29 ( $VTI_{diastolic}$ ) flow profiles, with the ratio ( $VTI_{diastolic/systolic}$ ) used to quantify the degree of  
30 regurgitation ( $VTI_{ratio}$ ). To generate mice with increasing grades of AR, valve puncture was  
31 repeated and  $VTI_{diastolic}$  was increased until the desired  $VTI_{ratio}$  was achieved. Sham-operated mice  
32 underwent the same procedure without puncturing of the aortic valve. To assess the nature of  
33 cardiac remodeling as a function of AR severity, only hearts with RegF  $\geq 20\%$  and  $\leq 60\%$  were  
34 included in the current study. Consistent with ACC/AHA Guidelines on AR (**2**), the severity of AR  
35 was graded as follows: (Grade 1) Mild ( $< 30\%$  RegF); (Grade 2) Moderate (30-39% RegF); (Grade  
36 3) Moderate-Severe (40-49% RegF); and (Grade 4) Severe ( $\geq 50\%$  RegF).

37 A 4-week time period was chosen to align with the compensatory and asymptomatic phase  
38 of left ventricular remodeling (LV), prior to LV remodeling reaching functional thresholds (i.e.,  
39 ejection fraction  $\leq 55\%$ ) for surgical intervention as outlined in ACC/AHA guidelines (**2**).

40

41 **Telemetric Hemodynamics:** Radiofrequency-emitting hemodynamic telemetry devices (PA-  
42 C10, Data Sciences International) were implanted in the left ventricle (LV) as previously described  
43 (**3**). Briefly, mice were anesthetized (2.5% induction, 1.5%–2% maintenance isoflurane in  
44 oxygen), given a loading dose of Metacam (2mg/kg sc), and maintained at a temperature at 37°C  
45 on a heating pad. Respiration was maintained at 1.5–2 Hz. Under aseptic conditions, the ventral

46 thoracic region was shaved, cleaned, and a ventral midline incision was made. The right common  
47 carotid artery was isolated with blunt dissection, ligated (5-0 silk), and bathed in 2% lidocaine  
48 solution. Following the Sham or aortic regurgitation procedure (described above), the  
49 hemodynamic catheter was quickly introduced into the carotid artery, advanced into the LV, and  
50 secured with suture. Correct positioning of the catheter within the LV was determined by  
51 monitoring the raw pressure trace to avoid contact pressures. Left ventricular end-systolic  
52 (LVESP) and end-diastolic (LVEDP) blood pressures were determined on a beat-to-beat basis and  
53 recorded continuously for the first week post-AR, and for a 48-hour window for each subsequent  
54 week thereafter. Data analysis was performed using Ponemah P3 Plus software (v6.4; Data  
55 Sciences International). Parameters were recorded at a sampling rate of 500Hz.

56

57 **Echocardiography:** Left ventricular (LV) functional and morphological remodeling in one-day  
58 Sham and AR mice was assessed as previously described (4). Briefly, mice were anaesthetized  
59 with 1.5% isoflurane oxygen mixture and placed on a heated stage that maintained body  
60 temperature between 36.9-37.3°C. Transthoracic M-mode echocardiographic examination was  
61 conducted using an ultrasonic linear transducer scanning head (30MHz)(Vevo2100, VisualSonics,  
62 Toronto, Canada). Changes in LV structural and functional indices were assessed in the parasternal  
63 long-axis view using transthoracic M-mode. Ejection fraction (EF) was determined using bi-plane  
64 modified Simpson method (2D parasternal long-axis)(5). Data analysis was performed using the  
65 VisualSonics cardiac data analysis suite (VEVO Lab).

66

67 **Cardiac electrical remodeling and arrhythmia vulnerability:** Electrical properties and  
68 arrhythmia vulnerability were assessed as previously described (6). Briefly, following  
69 anaesthetization (1.5% isoflurane oxygen mixture), the right jugular vein was isolated, and a suture  
70 was tied anteriorly around the vessel. Next, a 2.0F octapolar recording/stimulation EP catheter  
71 (CI'BER Mouse, Numed) was inserted into the vessel and advanced into the right ventricle.  
72 Programmed electrical stimulations were delivered to the right ventricle to assess arrhythmia  
73 vulnerability. Our protocols for arrhythmia assessment were based on previously published  
74 protocols using burst pacing with intervals less than atrial effective refractory in mice (7). All  
75 stimulations were delivered at a magnitude of 1.5x capture threshold and 1ms pulse duration.  
76 Effective refractory periods (ERPs) were determined by delivering nine pulses at a rate 20ms  
77 below the R-R interval followed by an extra stimulation. The S2 coupling interval was initially  
78 delivered above capture (~40ms) and reduced by variable increments until capture was achieved.  
79 For arrhythmia induction, two protocols were used. First, 27 pulses at 40ms intervals were applied  
80 the ventricle and reduced at 2ms decrements to 20ms. Next, 20 trains (every 1.5s) of 20 pulses  
81 (2ms duration) at a 20ms interpulse interval were applied. Only reproducible episodes of rapid,  
82 chaotic, and continuous ventricular activity  $\geq 10$ s were defined as a sustained arrhythmic event.

83 **Optical mapping:** Optical mapping of isolated denervated atria was assessed as previously  
84 described (8). Briefly, heparinized mice were euthanized with an anaesthetic overdose of  
85 isoflurane (~5%). After deep anaesthesia was achieved, the thorax was opened by mid-sternal  
86 incision. The heart was quickly excised into warm (35°C) Tyrodes solution (in mmol/L): 140 NaCl,  
87 5.4 KCl, 1.2 KH<sub>2</sub>PO<sub>4</sub>, 1 MgCl<sub>2</sub>, 1.8 CaCl<sub>2</sub>, 5.55 D-glucose, 5 HEPES, and 10 U/mL heparin (pH  
88 7.4). The heart was pinned to a Sylgard coated Petri dish, and the pericardium and any other  
89 residual tissue were excised. The atria were separated from the ventricles by making an incision

90 along the connective tissue in the atrioventricular groove. Atria were pinned to reveal the mitral  
91 and tricuspid valves, and atrial fat pads and residual tissue were removed. Next, the orientation of  
92 the atria was flipped to expose the pulmonary veins, the mitral and bicuspid valves were removed,  
93 and any additional residual tissue was excised. Finally, incisions were made in a straight path along  
94 the superior and inferior vena cava to ‘open’ the atria. Atria were then transferred to a separate  
95 dish and superfused continuously with carbogenized (95% O<sub>2</sub>/5% CO<sub>2</sub>) Krebs solution containing  
96 20 mM 2,3-butanedione monoxime (BDM)(Sigma-Aldrich, B0753), to inhibit contraction and  
97 minimize movement artefacts (9), from a reservoir container connected via a water-jacketed  
98 perfusion line to a perfusion pump (Masterflex® C/L® Analog Variable-Speed Pump) at a  
99 constant volume and flow rate (2.0-2.5 ml/min) at 35°C (in mmol/L): 118 NaCl, 4.2 KCl, 1.2  
100 KH<sub>2</sub>PO<sub>4</sub>, 1.5 CaCl<sub>2</sub>, 1.2 MgSO<sub>4</sub>, 2.3 NaHCO<sub>3</sub>, 20 D-glucose, and 2 Na-pyruvate (pH 7.35–7.4).

101 After atria were mounted and perfused, 3 Ag/AgCl electrodes were positioned within 1  
102 mm in a lead II electrogram configuration. Electrodes were attached to a Biopac amplifier (UIM-  
103 100C, CA., USA) whose output was digitized (AXON CNS Minidigi 1B, Molecular Devices, CA.,  
104 USA) and displayed continuously to record spontaneous rhythmic activity. If sinus rate dropped  
105 below 250 bpm, experiments were immediately terminated, and the heart was excluded from  
106 subsequent analyses.

107 Following 10-15 minutes of stabilization, isolated atria were stained for 5-7 min with a  
108 “loading” solution consisting of Kreb’s with 20 mM BDM plus voltage-sensitive dye (10µM, Di-  
109 4-ANEPPS, Sigma-Aldrich) and then continuously superfused with carbogenized Krebs solution  
110 (35°C, pH: 7.35–7.4). Optical recordings were made by exciting the atrial surface using a high-  
111 powered LED illumination system (LEX20LZ4, 530 nm peak wavelength) controlled by an  
112 electronic shutter. Light was passed through a band-pass filter (531±40 nm) and fluorescent light

113 was passed through a 610 nm long-pass filter (Semrock, Rochester, NY). Images were collected  
114 from a 14 x 14 mm field of view using a 0.63x objective lens (NA = 0.35) and projected onto a  
115 complementary metal oxide semiconductor (CMOS) camera equipped with sensors containing  
116 100x100 pixels (MiCAM Ultima-L, SciMedia, Costa Mesa, CA., USA).

117         Optical recordings were made during sinus rhythm or pacing at a 90-ms cycle length by  
118 applying 1ms pulses at a voltage 1.5x the capture threshold applied to the epicardial surface using  
119 platinum electrodes (spaced ~1 mm apart) attached to a stimulator (Pulsar i6 Stimulator, Frederick  
120 Haer & Co (FHC), Bowdoinham, ME). Images were captured using a high-speed camera (1000  
121 frames/s) (MiCAM Ultima-L, SciMedia) to generate activation maps and calculate conduction  
122 velocities. Atria arrhythmia inducibility was assessed and characterized as described above.  
123 Collected images were stored using MiCAM Ultima Experiment Manager (Brainvision) and  
124 processed using BV\_Analyze (Brainvision, Tokyo, Japan). Activation maps were generated of  
125 continuous (4 seconds) optical recordings and used to calculate conduction velocity using the  
126 MATLAB-based ElectroMap electrophysiology mapping software (10).

127

128 **Histology and immunohistological staining:** After functional assessments were completed,  
129 animals were weighed and euthanized with an anesthetic overdose of isoflurane (~5%). After deep  
130 anesthesia was achieved, the thorax was opened via a complete bilateral thoracotomy, the inferior  
131 vena cava cut, and hearts were perfused with PBS containing 1% KCl followed by 4% PFA in  
132 0.01M PBS administered transapically and stored in 35 mL of 4% PFA in 0.01M PBS overnight  
133 at 4°C. Hearts were excised, blotted dry, and weighed, and the atria and ventricular tissue were  
134 separated to weigh individual chambers. The right tibia was harvested and measured for heart  
135 weight normalization (**Supplementary Table 1**). Next, hearts were washed three times for 1 h

136 with PBS, cleaned and sagittally cut with a scalpel to reveal the four-chamber view. Individual  
137 heart halves underwent sequential washes with increasing concentrations of ethanol (70%, 80%,  
138 95% and 100% x 2) and xylene (xylene-ethanol, xylene x 2) and were placed in paraffin overnight  
139 at 60-70°C for embedding in paraffin blocks.

140 For histology, the paraffin blocks were deparaffinized as previously described (11) and  
141 were sliced into 5µm thin sections, at three levels (100 µm apart), sections were stained with  
142 Picrosirius red (PSR) for collagen visualization and quantification. The atria were imaged using  
143 an Aperio AT2 brightfield whole slide scanner (Leica Biosystems, Wetzlar, Germany) (20x; 0.5  
144 µm/pixel) and analysed with Aperio ImageScope. Collagen expression was quantified using  
145 ImageJ software (NIH, Bethesda, MD, USA) as the ratio of positively stained tissue area to total  
146 tissue area of each section using the threshold method (12), which exploits the brightness of  
147 collagen-stained tissue relative to background tissue and expresses collagen as a percentage  
148 relative to total tissue pixel counts.

149 To visualize macrophage infiltration, mouse cardiac macrophages were identified using a  
150 rat anti-mouse primary F4-80 antibody (dilution 1:100; RRID: AB\_323 806; Bio-Rad,  
151 Mississauga, ON, Canada) with secondary goat anti-rat 647 antibodies (dilution 1:100; RRID:  
152 AB\_141 778; Invitrogen, Burlington, ON, Canada) that have been previously validated in murine  
153 heart tissue (13, 14). Wheat germ agglutinin (WGA)(dilution 1:100) was used to stain the membrane,  
154 and slides were mounted with anti-fade 4'-6-diamidino-2-phenylindole (DAPI)-containing  
155 medium (Invitrogen) to stain cell nuclei.

156 A Nikon A1R (Nikon) confocal laser scanning microscopy system was used to acquire the  
157 whole atrium image of each section by combining both XY stitching and Z stack function. To  
158 quantify macrophage infiltration, F4/80+ cell counts per mm<sup>2</sup> of tissue area were determined for

159 each slice, where only cells co-staining for DAPI and F4-80 were considered true macrophages.  
160 For ventricular assessments, 5–10 images were randomly sampled from the LV of each section  
161 and quantified as above.

162

163 **Quantitative real-time PCR:** Heparinized mice were anesthetized (2.5% isoflurane) and  
164 sacrificed via cervical dislocation. Hearts were quickly excised into cold phosphate-buffered saline  
165 (PBS) to inhibit protein and RNA degradation and cell death. Whole hearts were weighed,  
166 dissected into left atrial appendage (LAA) and left ventricular (LV) free wall, and each chamber  
167 was weighed and flash-frozen in liquid nitrogen to preserve RNA integrity. Frozen tissue (atria  
168 and left ventricular free wall) was sonicated in 500µl TRIzol reagent (Invitrogen, 15596026).  
169 Lysates were centrifuged, and the resulting supernatant was combined with 100 µl of chloroform  
170 for phase separation. The upper aqueous layer was isolated, mixed with 300 µL of isopropanol to  
171 precipitate the RNA, and then transferred to silica-based RNA binding columns. RNA purification  
172 was completed using the Aurum™ RNA Mini Kit (Bio-Rad, #7326820) according to the  
173 manufacturer's instructions.

174 RNA concentration and purity were assessed using a Nanodrop™ One Microvolume UV-  
175 Vis Spectrophotometer (Thermo Fisher Scientific). Reverse transcription was performed using the  
176 High-Capacity cDNA Reverse Transcription Kit (Applied Biosystems, #4368814) with 500ng  
177 total RNA per reaction.

178 Relative mRNA transcript levels (normalized to GAPDH) were determined with  
179 quantitative real-time PCR using PowerUp™ SYBR™ Green Master Mix (Applied Biosystems,  
180 #A25741) on the CFX Opus 96 Real-Time PCR System (BIO-RAD – 12011319). Each 10 µL  
181 reaction contained 10 ng cDNA, 5µl SYBR and 500nm of both forward and reverse primers and

182 run for 40 cycles at 60°C. GAPDH was used as the housekeeping gene. The expression levels were  
183 measured using the  $\Delta\Delta$ CT method, and data were reported as fold change.

184 The following primer sequences were used: *Lox*, 5'-CAAGGGACATCGGACTTCTTA-  
185 3' (forward), 5'-TGGCATCAAGCAGGTCATAG-3' (reverse); *Lox11*, 5'-  
186 GCCAGTGGATCGACATAACTG-3' (forward), 5'-ACAATGTACTTGGGGTTCACG-3'  
187 (reverse); *Lox12*, 5'-TGACTGCCAGTGGATAGACATC-3' (forward), 5'-  
188 GTTGGGGTTAATGACAACCTG-3' (reverse); *Lox13*, 5'-CTACTGCTGCTACACTGTCTGT-  
189 3' (forward), 5'-GACCTCATAGGGCTTTCTAGGA-3' (reverse); *Lox14*, 5'-  
190 TGCCGCTGCAAGTATGATG-3' (forward), 5'-TG TTCCTGAGACGCTGTTCC-3' (reverse);  
191 *Coll1a1*, 5'-TTTGGATGGTGCCAAGGGAG-3' (forward), 5'-  
192 CACCATCATTTCACGAGCA-3' (reverse); *Col3a1*, 5'-AAGGCTGCAAGATGGATGCT-3'  
193 (forward), 5'-AAGGCTGCAAGATGGATGCT-3' (reverse); *Col4a1*, 5'-  
194 ATGGCTTGCCTGGAGAGATAGG-3' (forward), 5'-TGGTTGCCCTTTGAGTCCTGGA-3'  
195 (reverse); *Fnl1*, 5'-GGGAGGAAGAAGACAGATGAG-3' (forward), 5'-  
196 TACCCAGGGTTGGTGATGAA-3' (reverse); *Tgfb*, 5'-GGAATACAGGGCTTTCGATT-3'  
197 (forward), 5'-CTCTGTGGAGCTGAAGCAAT-3' (reverse); *Mmp2*, 5'-  
198 GATACCCTCAAGAAGATGCAGAAGT-3' (forward), 5'-ATCTTGGCTTCCGCATGGT-3'  
199 (reverse); *Mmp9*, 5'-AATCTCTTCTAGAGACTGGGAAGGAG-3' (forward), 5'-  
200 AGCTGATTGACTAAAGTAGCTGGA-3' (reverse); *Nppa*, 5'-  
201 TGATGGATTTCAAGAACCTGCT-3' (forward), 5'-TCTCAGAGGTGGGTTGACCT-3'  
202 (reverse); *Nppb*, 5'-TTTGGGCTGTAACGCACTGA-3' (forward), 5'-  
203 TCTCAGAGGTGGGTTGACCT-3' (reverse); *Tnf*, 5'-CCCACGTCGTAGCAAACCA-3'  
204 (forward), 5'-ACAAGGTACAACCCATCGGC-3' (reverse); *Il1b*, 5'-

205 CAACCAACAAGTGATATTCTCCATG-3' (forward), 5'- GATCCACACTCTCCAGCTGCA-  
206 3' (reverse); *Il6*, 5'-GAGGATACCACTCCCAACAGACC-3' (forward), 5'-  
207 AAGTGCATCATCGTTGTTTCATACA-3' (reverse); *Eln*, 5'-  
208 CAGGAGTTAGGCTCCCAGGT-3' (forward), 5'- TCCACCTCTGGCTCCGTATT-3'  
209 (reverse); *Myh7*, 5'- TACTTGCTACCCTCAGGTGGCT-3' (forward), 5'-  
210 GGTAAGCCCAGGCCTGTAGA-3' (reverse); *Gapdh*, 5'- TGCACCACCAACTGCTTAG-3'  
211 (forward), 5'- GGATGCAGGGATGATGTTC-3' (reverse).

212

213 **Sex as a biological variable:** Our study exclusively examined male mice because male mice  
214 exhibited less phenotypic and technical variability. Moreover, clinically men have been shown to  
215 have a higher prevalence of moderate-to-severe AR compared to women (15-17). Nonetheless, a  
216 preliminary pilot study suggests the findings are relevant for female mice.

217

218 **Statistics:** Data are presented as mean±SEM. Continuous variables were compared between group  
219 (Sham versus AR) and/or chamber (atria versus ventricle) with 2-tailed Student's *t*-tests or a two-  
220 way ANOVA with subsequent pairwise comparisons adjusted with the Sidak's multiple-  
221 comparison approach. Homogeneity of variance was assessed using Levene's test. AF durations  
222 were assessed using a Mann Whitney U test with Dunn's multiple comparison test as the data were  
223 not normally distributed (D'Agostino & Pearson omnibus normality test). To compare arrhythmic  
224 events, a 2x2 contingency table with Fisher's exact test was used. A repeated measure two-way  
225 ANOVA with Sidak's multiple-comparison test was used to analyze changes in end-systolic and  
226 end-diastolic pressures as well as derivatives of maximal and minimal changes in pressure with  
227 changes in time within and between Sham and AR telemetry-implanted mice. To determine the

228 relationship between AR severity ( $VTI_{ratio}$ ) and outcome variables, a linear regression ordinary  
229 least squares (OLS) or generalized linear model (GLM) was used. For the relationship between  
230  $VTI_{ratio}$  and arrhythmia durations, after visual inspection of the data with a scatterplot, a GLM with  
231 a gamma distribution and log link function was used to assess the association between  $VTI_{ratio}$   
232 and atrial arrhythmia durations for both atria and ventricles. A gamma distribution was deemed  
233 appropriate because the atrial arrhythmia duration is strictly positive ( $Y > 0$  seconds) and variance  
234 in  $Y$  increased with the mean of  $Y$ , with the log link ensuring all predictions remain strictly positive  
235 and models for a curvilinear (multiplicative) relationship between  $X$  and  $Y$ .  $P$  values  $< 0.05$  were  
236 considered statistically significant. All statistical analyses were carried out using GraphPad Prism  
237 (GraphPad Software, Inc).

238

239 **Study approval:** This study was carried out in adherence with the current guidelines of the  
240 Canadian Council on Animal Care and National Institutes of Health (NIH). The protocol was  
241 approved by the Animal Care Committee at York University (2019-14).

242

243 **Data availability:** All data in this study are available in the Supporting Data Values file as well as  
244 from the corresponding author upon reasonable request.

245

246 **Acknowledgements**

247 None

248

249 **Funding Support:** This work was supported by Canadian Institutes of Health Research (CIHR)  
250 grant MOP-125950 and Canada Research Chair in Cardiovascular Biology (to PHB); a Canadian  
251 Foundation for Innovation John Evans Leader Award (to PHB); and a CIHR PDF (to RL).

252

### 253 **Author Contributions**

254 R.L. and P.H.B. conceptualized the study. R.L., X.L., D.S, R.D., N.P., and J.W. collected the data.

255 R.L. and M.D. analyzed the data, and R.L. prepared the manuscript. P.H.B supervised the work.

256

### 257 **REFERENCES**

- 258 1. Wu J, et al. Left ventricular response in the transition from hypertrophy to failure  
259 recapitulates distinct roles of Akt,  $\beta$ -arrestin-2, and CaMKII in mice with aortic  
260 regurgitation. *Annals of translational medicine*. 2020;8(5):219.
- 261 2. Otto CM, et al. 2020 ACC/AHA Guideline for the Management of Patients With Valvular  
262 Heart Disease: A Report of the American College of Cardiology/American Heart  
263 Association Joint Committee on Clinical Practice Guidelines. *Circulation*.  
264 2021;143(5):e72-e227.
- 265 3. Lakin R, et al. Differential negative effects of acute exhaustive swim exercise on the right  
266 ventricle is associated with disproportionate hemodynamic loading. *Am J Physiol Heart*  
267 *Circ Physiol*. 2021.
- 268 4. Aschar-Sobbi R, et al. Increased atrial arrhythmia susceptibility induced by intense  
269 endurance exercise in mice requires TNF $\alpha$ . *Nat Commun*. 2015;6:6018.
- 270 5. Heinen A, et al. Echocardiographic Analysis of Cardiac Function after Infarction in Mice:  
271 Validation of Single-Plane Long-Axis View Measurements and the Bi-Plane Simpson  
272 Method. *Ultrasound Med Biol*. 2018;44(7):1544-55.
- 273 6. Lakin R, et al. Inhibition of soluble TNF $\alpha$  prevents adverse atrial remodeling and  
274 atrial arrhythmia susceptibility induced in mice by endurance exercise. *J Mol Cell*  
275 *Cardiol*. 2019;129:165-73.
- 276 7. Tuomi JM. *Physiology*. Scholarship@Western: The University of Western Ontario;  
277 2011:209.
- 278 8. Lakin R, et al. Cardiomyocyte and endothelial cells play distinct roles in the tumour  
279 necrosis factor (TNF)-dependent atrial responses and increased atrial fibrillation  
280 vulnerability induced by endurance exercise training in mice. *Cardiovasc Res*.  
281 2023;119(16):2607-22.
- 282 9. Li T, Sperelakis N, Teneick RE, and Solaro RJ. Effects of diacetyl monoxime on cardiac  
283 excitation-contraction coupling. *J Pharmacol Exp Ther*. 1985;232(3):688-95.
- 284 10. O'Shea C, et al. ElectroMap: High-throughput open-source software for analysis and  
285 mapping of cardiac electrophysiology. *Sci Rep*. 2019;9(1):1389.

- 286 11. Gorman RA, et al. The effects of daily dose of intense exercise on cardiac responses and  
287 atrial fibrillation. *J Physiol.* 2024;602(4):569-96.
- 288 12. Hadi AM, et al. Rapid quantification of myocardial fibrosis: a new macro-based  
289 automated analysis. *Cell Oncol (Dordr).* 2011;34(4):343-54.
- 290 13. Mai H, et al. Whole-body cellular mapping in mouse using standard IgG antibodies. *Nat*  
291 *Biotechnol.* 2024;42(4):617-27.
- 292 14. Tamaki S, et al. Interleukin-16 promotes cardiac fibrosis and myocardial stiffening in  
293 heart failure with preserved ejection fraction. *PLoS One.* 2013;8(7):e68893.
- 294 15. Singh JP, et al. Prevalence and clinical determinants of mitral, tricuspid, and aortic  
295 regurgitation (the Framingham Heart Study). *Am J Cardiol.* 1999;83(6):897-902.
- 296 16. DesJardin JT, et al. Sex Differences and Similarities in Valvular Heart Disease. *Circ Res.*  
297 2022;130(4):455-73.
- 298 17. Mascherbauer J, et al. Sex-related differences in severe native valvular heart disease: the  
299 ESC-EORP Valvular Heart Disease II survey. *Eur Heart J.* 2024;45(37):3818-33.

300

## 301 SUPPLEMENTAL FIGURE

### 302 Figure Caption

303 **Figure S1. Graded aortic regurgitation (AR) induces ventricular remodeling without**  
304 **increasing ventricular arrhythmia vulnerability. (A)** Kaplan-Meier curve showing a 90%  
305 (20/22) survival in all mice subjected to aortic regurgitation (AR) and 100% (19/19) in Sham-  
306 operated mice. AR mice were euthanized due to post-operative clot formation (n=1) or VTIratio  
307  $\geq 60\%$  (n=1). **(B)** Representative initial 24-hour (acute) post-op implanted telemetry-derived  
308 hemodynamic tracking of the derivatives of the maximal and minimal rates of left ventricular  
309 (LV) pressure changes over time during isovolumic contraction ( $dP/dt_{max}$ ) and isovolumic  
310 relaxation ( $dP/dt_{min}$ )(bottom panels) in Sham (red) and AR (black) mice; light:dark cycles  
311 indicated. **(C)** Representative 4-week Sham and AR implanted telemetry-derived hemodynamics.  
312 Light:dark cycles indicated, AR mice show reduced lusitropic reserve and increased filling  
313 pressures during activity (dark cycle). **(D)** Changes in echocardiographically- and  
314 hemodynamically-derived LV structural and functional indices. AR mice show gradual LV  
315 dilatation (increased end-systolic and end-diastolic diameters) and functional decline (ejection  
316 fraction and  $dP/dt_{min}$ ) over 4-weeks in response to AR. **(E)** Ventricular arrhythmia durations were  
317 increased ( $P=0.055$ ) in AR versus Sham mice, with arrhythmia durations increasing as a function  
318 of the degree of regurgitation (VTI<sub>ratio</sub>) and the nature of the relationship to LV decompensation.  
319 **(F)** Ventricular weights-to-tibial length were increased in AR (n=12) compared to SHAM (n=10)  
320 mice, with the degree of hypertrophy increasing as a function of VTI<sub>ratio</sub>. **(G-H)** Bright field  
321 images of picosirius red (PSR) stained LV sections. Quantification of collagen deposition (%)  
322 show no significant elevation in LV fibrosis in AR (n=6) compared SHAM (n=5) mice. However,  
323 the degree of LV fibrosis increased as a function of the degree of aortic regurgitation (VTI<sub>ratio</sub>).  
324 **(I-J)** Confocal micrographs of LV sections stained with F4/80+ to quantify macrophage  
325 infiltration (arrows) in 4-week SHAM and AR mice. No significant difference in F4/80+ cell  
326 counts were observed between groups. Data presented as mean  $\pm$  SEM. *P* values from Student's  
327 *t*-test. \*\*\* $P < 0.001$ ; NS, not significant.

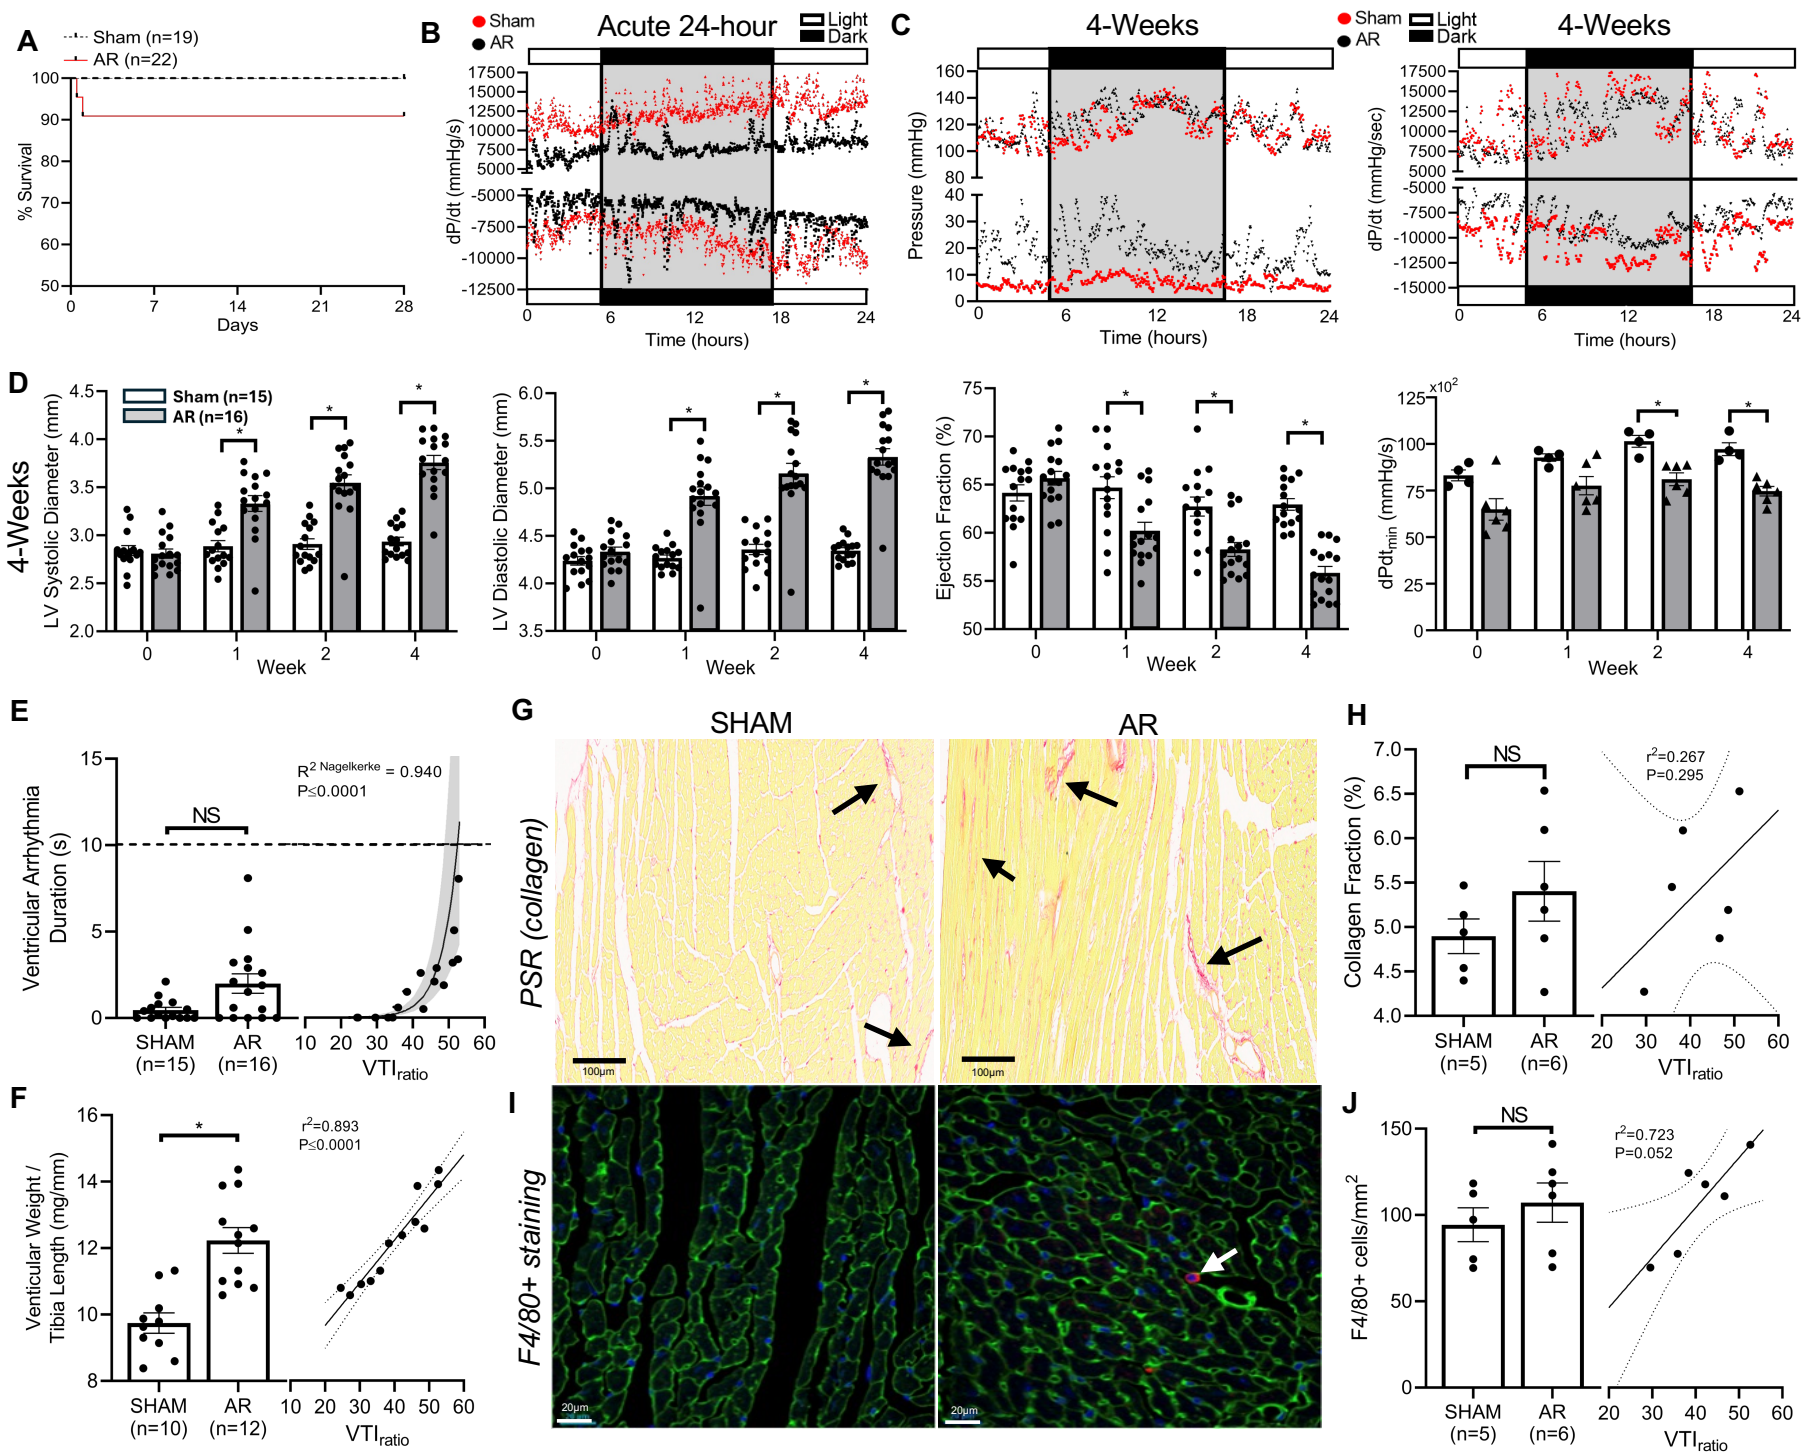

Supplemental Table 1

|                                        | Sham        | Aortic Regurgitation | P-value |
|----------------------------------------|-------------|----------------------|---------|
| <b>Morphometry <i>n</i></b>            | <b>15</b>   | <b>16</b>            |         |
| <b>Body weight (g)</b>                 | 45.4±1.1    | 43.7±1.1             | 0.3100  |
| <b><i>n</i></b>                        | <b>10</b>   | <b>12</b>            |         |
| <b>HW/TL (mg/mm)</b>                   | 10.6±0.3    | 13.5±0.4*            | ≤0.0001 |
| <b>AW/VW (mg/g)</b>                    | 92.6±2.0    | 101.8±4.9            | 0.1149  |
| <b>Echocardiography <i>n</i></b>       | <b>15</b>   | <b>16</b>            |         |
| <b>Heart rate (bpm)</b>                | 530±15      | 517±11               | 0.9401  |
| <b>Stroke Volume (μl)</b>              | 55.8±1.2    | 76.1±3.0*            | ≤0.0001 |
| <b>Fractional Shortening (%)</b>       | 34.5±0.4    | 29.9±0.7*            | ≤0.0001 |
| <b>Posterior Wall Thickness (mm)</b>   | 0.794±0.004 | 0.900±0.009*         | ≤0.0001 |
| <b>Hemodynamics <i>n</i></b>           | <b>4</b>    | <b>6</b>             |         |
| <b>LV End-Systolic Pressure (mmHg)</b> | 113.4±1.9   | 124.6±4.4            | 0.1950  |
| <b>dPdt<sub>max</sub> (mmHg/s)</b>     | 11,875±917  | 9,734±316            | 0.3994  |
| <b>dPdt<sub>min</sub> (mmHg/s)</b>     | 9,727±343   | 7,470±254*           | 0.0088  |
| <b>Electrophysiology <i>n</i></b>      | <b>15</b>   | <b>16</b>            |         |
| <b>Ventricular ERP (ms)</b>            | 28.5±0.8    | 29.2±0.8             | 0.5338  |
| <b>Atrioventricular ERP (ms)</b>       | 50.6±1.3    | 52.1±1.5             | 0.4472  |

AW, atrial weight; dPdt<sub>max</sub>, maximum rate of left ventricular pressure increase during isovolumic contraction; dPdt<sub>min</sub>, maximum rate of left ventricular pressure decrease during isovolumic relaxation; HW, heart weight; TL, tibia length; VW, ventricular weight

**Supplemental Table 2: Left atrial qPCR mRNA expression**

| Gene    | 1W SHAM           | 1W AR             | P-Value | 4W Sham         | 4W AR             | P-Value |
|---------|-------------------|-------------------|---------|-----------------|-------------------|---------|
| LOXL1   | 1.089±0.171 (7)   | 1.400±0.161 (4)   | 0.2594  | 1.100±0.281 (4) | 1.461±0.195 (4)   | 0.3323  |
| LOXL2   | 0.787±0.0638 (10) | 1.311±0.223 (10)* | 0.0336  | 1.154±0.239 (8) | 0.8262±0.120 (10) | 0.3599  |
| LOXL3   | 1.009±0.218 (10)  | 1.568±0.435 (10)  | 0.3527  | 1.059±0.216 (8) | 1.313±0.170 (10)  | 0.3154  |
| LOXL4   | 0.9381±0.141 (10) | 0.9375±0.144 (10) | 0.7959  | 1.089±0.182 (8) | 0.992±0.0976 (10) | 0.6965  |
| LOX     | 1.158±0.315 (6)   | 1.551±0.2838 (6)  | 0.3095  | 1.115±0.206 (5) | 1.306±0.275 (6)   | 0.6623  |
| COL I   | 0.9694±0.197 (10) | 2.196±0.484 (10)* | 0.0232  | 1.264±0.364 (5) | 0.9292±0.249 (6)  | 0.4286  |
| COL III | 1.010±0.117 (10)  | 3.018±0.891 (10)  | 0.1655  | 1.380±0.382 (8) | 1.238±0.209 (10)  | 0.9654  |
| COL IV  | 1.107±0.174 (10)  | 0.9846±0.173 (10) | 0.8534  | 0.561±0.161 (3) | 0.628±0.162 (4)   | 0.8571  |
| MMP2    | 1.137±0.158 (10)  | 1.137±0.125 (10)  | 0.7959  | 1.188±0.191 (8) | 0.821±0.0836 (10) | 0.0831  |
| MMP9    | 2.743±1.188 (7)   | 1.416±1.320 (4)   | 0.2303  | 1.316±0.265 (8) | 1.082±0.361 (10)  | 0.3154  |
| MMP9/2  | 2.459±0.995 (6)   | 13.57±5.852 (4)   | 0.1714  | 1.175±0.245 (9) | 3.760±1.615 (10)  | 0.9682  |
| FN1     | 1.093±0.221 (10)  | 1.328±0.253 (10)  | 0.4813  | 1.185±0.220 (7) | 1.799±0.529 (10)  | 0.6009  |
| ELN     | 1.144±0.281 (6)   | 2.373±0.781 (6)   | 0.3095  | 1.328±0.425 (5) | 1.930±0.606 (6)   | 0.6623  |
| TGF-β   | 1.256±0.393 (10)  | 1.814±0.595 (10)  | 0.6305  | 1.199±0.173 (8) | 0.460±0.120 (10)* | 0.0062  |
| Nppa    | 1.025±0.106 (6)   | 1.589±0.554 (6)   | 0.4848  | 3.111±0.913 (5) | 2.498±0.558 (6)   | 0.6623  |
| Nppb    | 1.041±0.121 (6)   | 1.408±0.265 (6)   | 0.5887  | 1.809±0.687 (5) | 1.953±0.320 (6)   | 0.6623  |
| MHY7    | 1.600±0.498 (6)   | 1.779±0.966 (6)   | 0.8182  | 1.295±0.454 (5) | 2.496±1.002 (5)   | 0.6905  |
| TNFα    | 1.182±0.275 (6)   | 0.885±0.170 (6)   | 0.6991  | 2.639±1.574 (5) | 0.355±0.086       | 0.2468  |
| IL-6    | 1.575±0.659 (6)   | 0.997±0.262 (6)   | 0.9372  | 2.422±1.233 (5) | 0.8542±0.185 (6)  | 0.6623  |
| IL-1β   | 1.178±0.283 (6)   | 0.5662±0.158 (6)  | 0.0931  | 1.978±0.904 (5) | 1.003±0.378 (6)   | 0.6623  |

Col I/III/IV, collagen I/III/IV; ELN, elastin; FN1, fibronectin 1; IL-6, interleukin-6; IL-1β, interleukin-1 beta; LOX, lysyl oxidase; LOXL1/2/3/4, LOX-like enzyme 1/2/3/4; MHY7, beta-myosin heavy chain; MMP2/9/14, matrix metalloproteinase 2/9; Nppa, atrial natriuretic peptide; Nppb, B-type natriuretic peptide; TGF-β, transforming growth factor β; TNFα, tumor necrosis factor-alpha

**Supplemental Table 3: Left ventricular qPCR mRNA expression**

| Gene           | 1W SHAM           | 1W AR              | P-Value | 4W Sham         | 4W AR            | P-Value |
|----------------|-------------------|--------------------|---------|-----------------|------------------|---------|
| <b>LOXL1</b>   | 1.035±0.104 (7)   | 2.281±0.583 (4)*   | 0.0242  | 1.051±0.164 (5) | 0.494±0.127 (5)  | 0.4776  |
| <b>LOXL2</b>   | 1.068±0.0943 (10) | 1.643±0.311 (10)   | 0.1230  | 1.024±0.160 (5) | 0.742±0.0684 (6) | 0.0823  |
| <b>LOXL3</b>   | 1.068±0.116 (10)  | 1.381±0.206 (10)   | 0.1903  | 0.993±0.118 (5) | 0.913±0.117 (6)  | 0.6623  |
| <b>LOXL4</b>   | 1.052±0.119 (10)  | 1.298±0.171 (10)   | 0.1903  | 0.997±0.121 (5) | 0.954±0.158 (6)  | 0.9999  |
| <b>LOX</b>     | 1.056±0.155 (6)   | 1.840±0.685 (6)    | 0.4848  | 1.033±0.129 (6) | 1.232±0.353 (6)  | 0.8182  |
| <b>COL I</b>   | 1.050±0.155 (6)   | 4.247±2.223 (4)    | 0.4762  | 1.047±0.163 (5) | 0.775±0.247 (5)  | 0.7125  |
| <b>COL III</b> | 1.108±0.230 (7)   | 2.270±0.419 (4)*   | 0.0424  | 1.033±0.136 (5) | 0.566±0.077 (5)  | 0.4095  |
| <b>COL IV</b>  | 1.019±0.0913 (6)  | 0.9886±0.127 (6)   | 0.9372  | 1.042±0.167 (5) | 0.789±0.098 (5)  | 0.9323  |
| <b>MMP2</b>    | 1.050±0.141 (7)   | 1.532±0.0516 (4)   | 0.1091  | 1.039±0.140 (5) | 0.513±0.074 (5)  | 0.3186  |
| <b>MMP9</b>    | 1.104±0.112 (10)  | 0.5820±0.104 (10)* | 0.0052  | 1.141±0.244 (5) | 0.879±0.144 (6)  | 0.6623  |
| <b>FN1</b>     | 1.015±0.0773 (10) | 2.230±0.398 (10)*  | 0.0288  | 1.088±0.223 (5) | 1.193±0.188 (6)  | 0.6623  |
| <b>ELN</b>     | 1.008±0.0559 (6)  | 1.318±0.169 (6)    | 0.1797  | 1.219±0.345 (6) | 1.097±0.101 (6)  | 0.4848  |
| <b>TGF-β</b>   | 1.046±0.122 (9)   | 0.8596±0.153 (10)  | 0.4002  | 0.978±0.109 (5) | 1.131±0.105 (6)  | 0.9307  |
| <b>Nppa</b>    | 1.201±0.344 (6)   | 4.410±0.865 (6)*   | 0.0152  | 1.087±0.182 (5) | 4.243±1.395 (6)* | 0.0087  |
| <b>Nppb</b>    | 1.032±0.107 (6)   | 2.011 ±0.103 (6)*  | 0.0022  | 1.050±0.151 (6) | 4.477±0.682 (6)* | 0.0022  |
| <b>MHY7</b>    | 2.129±1.042       | 0.677±0.318        | 0.3095  | 1.047±0.135     | 3.939±1.630      | 0.0649  |
| <b>TNFα</b>    | 1.007±0.0510 (6)  | 1.093±0.0728 (6)   | 0.2403  | 1.484±1.091 (5) | 0.557±0.182 (6)  | 0.7922  |
| <b>IL-6</b>    | 1.031±0.130 (5)   | 1.727 ±0.298 (6)   | 0.0519  | 1.917±0.870 (6) | 0.651±0.0656 (6) | 0.4848  |
| <b>IL-1β</b>   | 1.056±0.193 (5)   | 0.5433±0.096 (6)*  | 0.0303  | 1.810±0.864     | 0.999±0.487      | 0.6991  |

Col I/III/IV, collagen I/III/IV; ELN, elastin; FN1, fibronectin 1; IL-6, interleukin-6; IL-1β, interleukin-1 beta; LOX, lysyl oxidase; LOXL1/2/3/4, LOX-like enzyme 1/2/3/4; MHY7, beta-myosin heavy chain; MMP2/9/14, matrix metalloproteinase 2/9; Nppa, atrial natriuretic peptide; Nppb, B-type natriuretic peptide; TGF-β, transforming growth factor β; TNFα, tumor necrosis factor-alpha
